# Supplementary material
Source: Research Square preprint supplement (doi:10.21203/rs.3.rs-9651238/v1)
Supplement: Supplementary file 1 [file 1c1d5f11586c78a1f19c4b57.pdf]

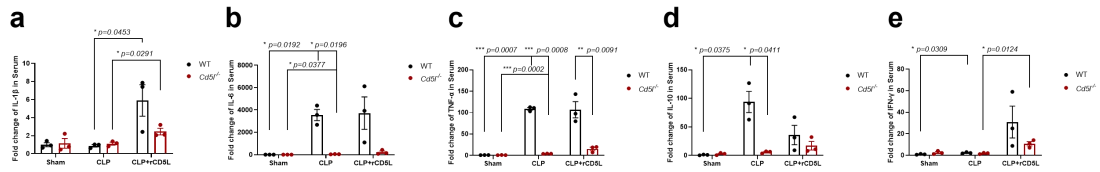

**Supplementary Figure 1. rCD5L administration elevated serum inflammatory cytokine level in CLP-induced sepsis.** Cytokine levels in serum from CLP-treated mice treated with or without rCD5L (2 $\mu$ g/injection) were measured by LEGNDplex™ assay at 24 h after injection. Sham-WT was set as control group. **(a,b,c,d,e)** Fold change of concentration of IL-1 $\beta$ , IL-6, TNF- $\alpha$ , IL-10 and IFN- $\gamma$  in serum. (n=3 per group) Results are representative data from two independent experiments. Data are presented as the mean  $\pm$  SEM and analyzed by t-test.
